# Supplementary material for: A nitrogen and phosphorus enriched pyridine bridged inorganic–organic hybrid material for supercapacitor application
Source: Royal Society of Chemistry journal article supplement (doi:10.1039/c9nj03976g), 2019-01-01
Supplement: c9nj03976g1.pdf [file c9nj03976g1.pdf]

# Nitrogen and phosphorus enriched pyridine bridged inorganic-organic hybrid material for supercapacitor application

Nisha Dhiman and Paritosh Mohanty\*

Functional Materials Laboratory, Department of Chemistry, Indian Institute of Technology

Roorkee, Roorkee, Uttarakhand-247667, India

\*E-mail: pmfcy@iitr.ac.in, paritosh75@gmail.com

Phone: +91-1332-284859, Fax: +91-1332-286202

## *Characterization of HPHM*

The structural characterization of HPHM was carried out using FT-IR, NMR, XPS and XRD. The FT-IR spectra were recorded on Perkin Elmer spectrum 2 spectrophotometer. The  $^{13}\text{C}$  and  $^{31}\text{P}$  cross polarization magic angle spinning (CP-MAS) NMR spectra, and  $^{13}\text{C}$  and  $^{31}\text{P}$  NMR spectra of the precursors were taken using JEOL resonance JNM-ECX-400II spectrophotometer. The XPS of HPHM has been carried out using PHI 5000 Versa Probe III. The XRD pattern of the specimen was obtained using Bruker D8 FOCUS X-ray diffractometer with Cu  $K_{\alpha}$  radiation ( $\lambda = 1.5405 \text{ \AA}$ ) at a scanning speed of  $4^{\circ} \text{ min}^{-1}$  in the  $2\theta$  range of 10-80 degree. The FESEM images of the HPHM was recorded on Zeiss Ultra Plus (Carl Zeiss) with an operating voltage of 20 kV. The TEM images were obtained using TECNAIG<sup>2</sup>S-TWIN microscope. The

thermogravimetric analysis (TGA) was carried out in air using EXSTAR TG/DTA6300 at 10 °C min<sup>-1</sup> heating rate. The specific surface area ( $SA_{\text{BET}}$ ) was estimated using N<sub>2</sub> sorption analysis (Autosorb iQ<sub>2</sub>, Quantachrome instruments, USA).

The electrochemical experiments such as cyclic voltammetry (CV), galvanostatic charge-discharge (GCD) and electrochemical impedance spectroscopy (EIS) were performed using a Multi Autolab/M204 electrochemical workstation (Metrohm Autolab B.V., Netherlands). A three-electrode assembly with graphite sheet based electrode of 1 cm<sup>2</sup> dimension as working electrode, Pt wire as counter electrode and double junction silver/silver chloride (Ag/AgCl) electrode as reference electrode<sup>S1-S5</sup>, was used. For the preparation of the graphite sheet based working electrode, in the first step a slurry was prepared by using active material (HPHM, 70 wt %), conducting carbon (Super P, Alfa Aesar, India, 15 wt %), and polyvinylidene fluoride (PVDF, Alfa Aesar, India, 15 wt %) in N-methylpyrrolidone (NMP, Himedia, India).<sup>S6,S7</sup> In order to make the slurry uniform, the slurry mixture was stirred in a magnetic stirrer for 48 h at 20 °C. The working electrodes with uniform film, different mass loading were prepared by coating the slurry on graphite sheet and dried over night at 80 °C and further, used for the electrochemical studies. To optimize the optimal mass of active material, the synthesized electrodes were employed for electrochemical measurements; CV, GCD by sweeping supercapacitor electrode between potential range of -0.7 to + 0.3 V in 0.5 N KOH and the EIS has been done at 10 mV in frequency range of 0.1 Hz to 1 kHz. Further, the solid state symmetric supercapacitor device was fabricated using PVA-KOH as electrolyte, Whatman filter paper as separator and active material with mass loading of 2.37 mg was coated on graphite sheet of 3 cm<sup>2</sup> dimension. The electrodes were dipped for 5 minutes in PVA-KOH gel, further assembled to make solid

state symmetric device to lit up the LEDs. The areal ( $C_{ar}$ ) and specific ( $C_{sp}$ ) capacitance of the electrodes from CV measurement were calculated by using eqn (S1a and S1b).

$$C_{ar} = \frac{\int I \Delta V}{v \times \Delta V \times A} \quad (S1a)$$

$$C_{sp} = \frac{\int I \Delta V}{v \times \Delta V \times m} \quad (S1b)$$

Specific capacitance from GCD was calculated using the eqn (S2):

$$C_{sp} = \left( \frac{I}{m} \right) \times \frac{\Delta t}{\Delta V - IR} \quad (S2)$$

Energy and power densities were calculated by employing eqn (S3) and (S4), respectively,

$$E = \frac{1}{2} \times C_{sp} \times \Delta V^2 \left( \frac{1000}{3600} \right) \quad (S3)$$

$$P = \frac{E}{\Delta t} \times 3600 \quad (S4)$$

where,  $I$  is response current in ampere,  $\Delta V$  is the potential window (V),  $v$  is scan rate ( $\text{mV s}^{-1}$ ),  $m$  (g), and  $A$  ( $\text{cm}^2$ ) is the mass and area of active material respectively,  $\Delta t$  is the discharge time in sec,  $E$  ( $\text{Wh kg}^{-1}$ ) and  $P$  ( $\text{W kg}^{-1}$ ) energy and power density respectively.<sup>S6,S7</sup>

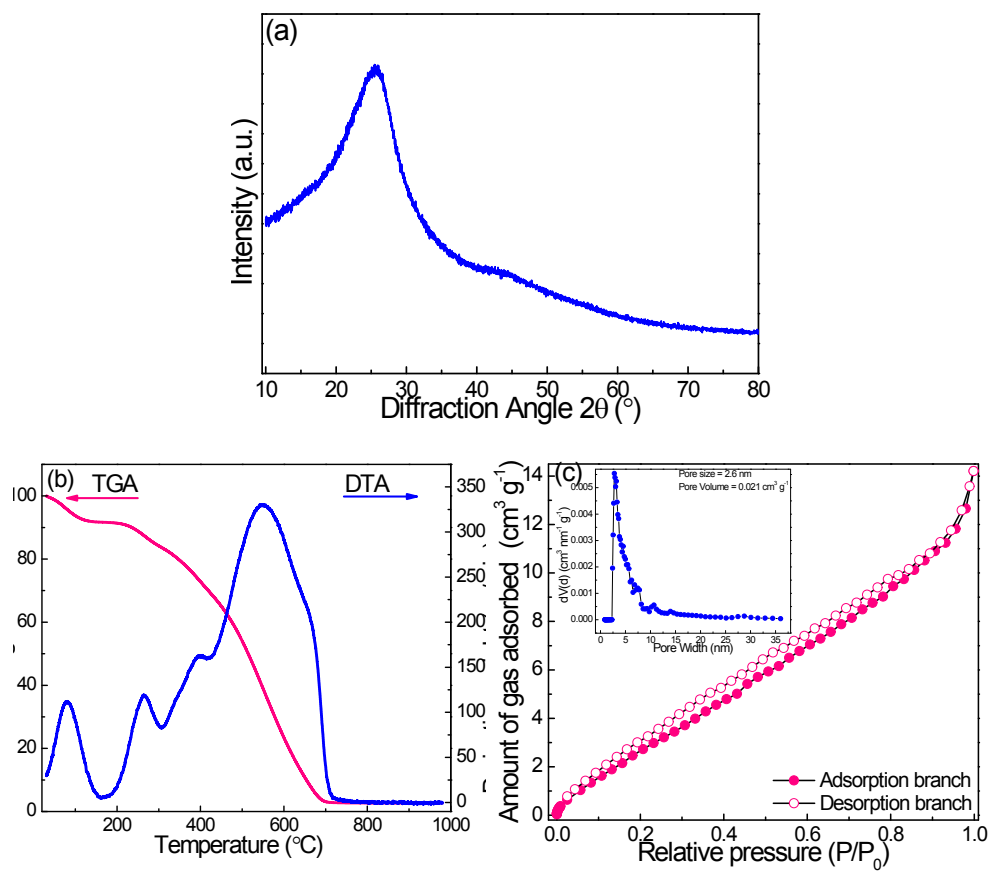

**Fig. S1** (a) XRD (b) TGA and (c)  $\text{N}_2$  sorption isotherm (inset pore size distribution) of HPHM.

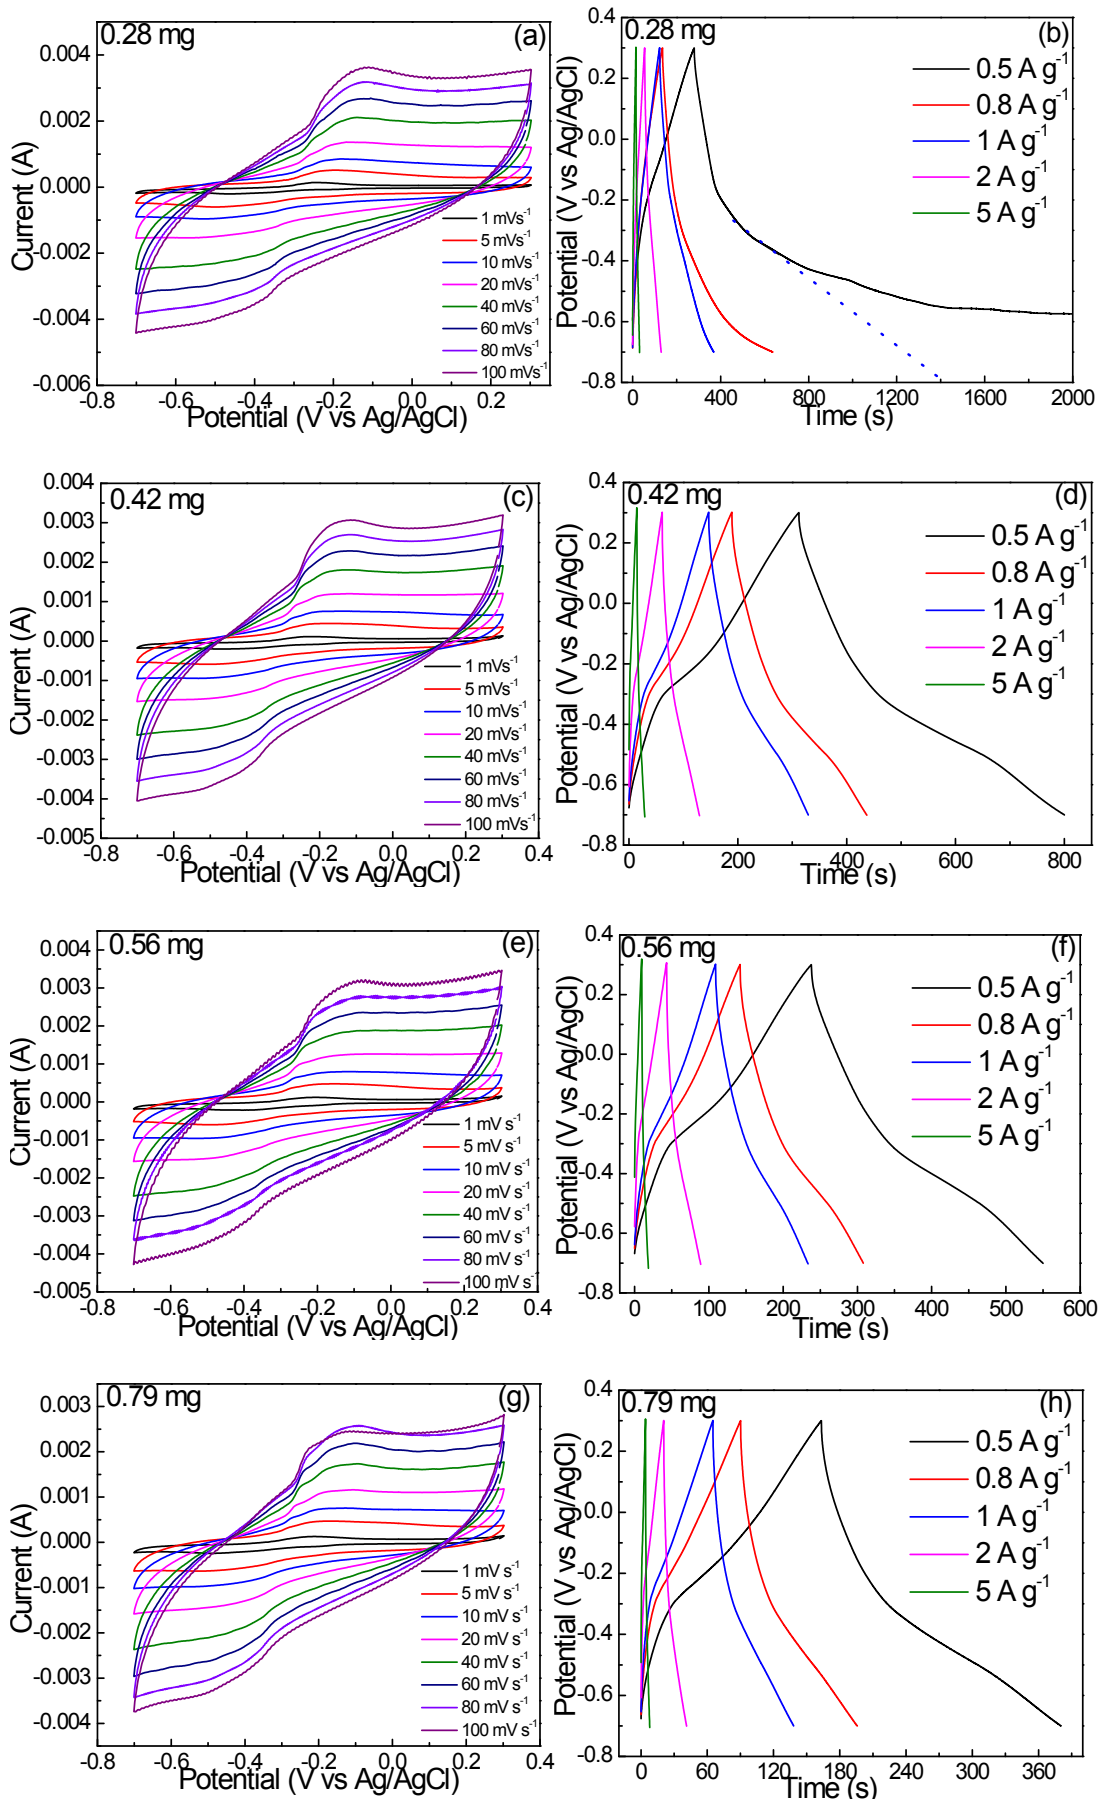

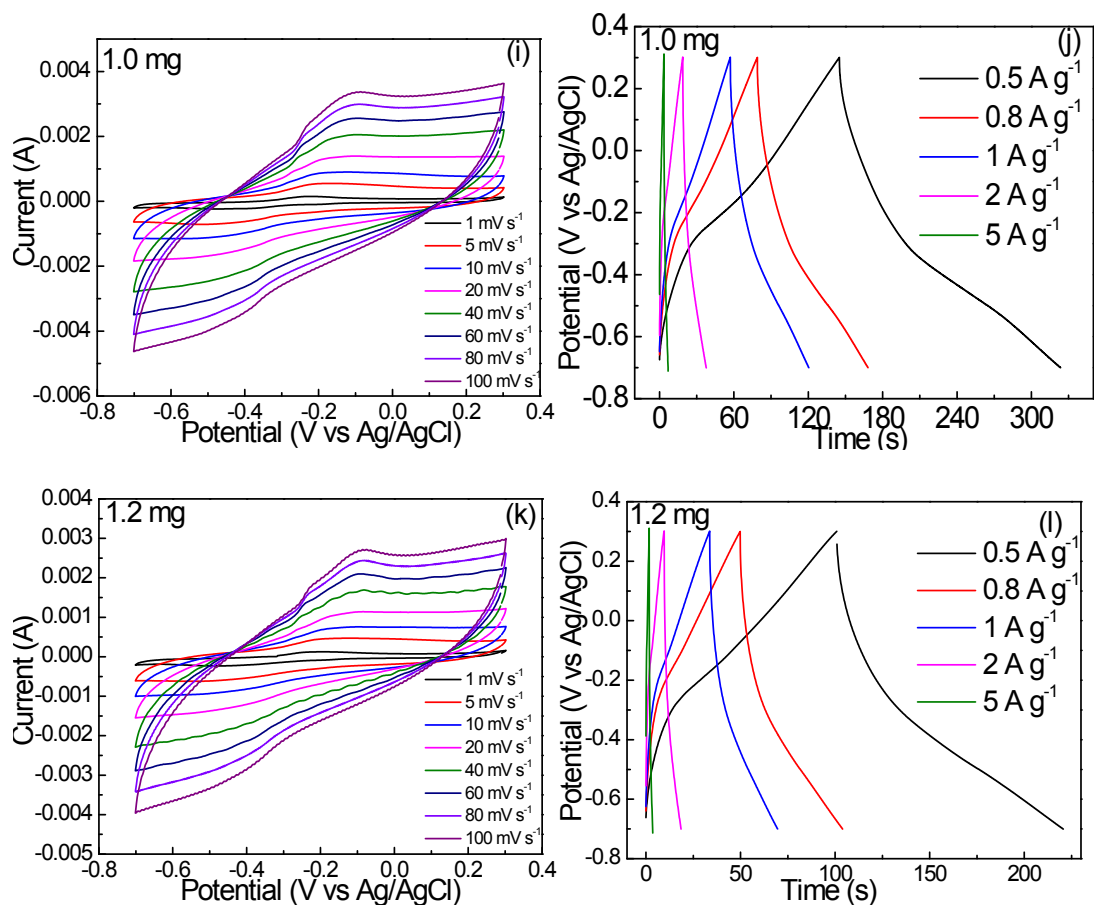

**Fig. S2** CV (a, c, e, g, i and k) and GCD (b, d, f, h, j and l) of HPHM supercapacitor electrodes at different mass loading.

**Table. S1a** Specific capacitance values calculated from CV

| S. No | Active Mass (mg) | Specific Capacitance (F g <sup>-1</sup> ) from CV |     |     |     |     |     |     |     |  |
|-------|------------------|---------------------------------------------------|-----|-----|-----|-----|-----|-----|-----|--|
|       |                  | Scan Rate (mV s <sup>-1</sup> )                   |     |     |     |     |     |     |     |  |
|       |                  | 1                                                 | 5   | 10  | 20  | 40  | 60  | 80  | 100 |  |
| 1     | 0.28             | 555                                               | 424 | 357 | 303 | 241 | 202 | 183 | 167 |  |
| 2     | 0.42             | 390                                               | 287 | 238 | 190 | 148 | 123 | 107 | 97  |  |
| 3     | 0.56             | 312                                               | 224 | 196 | 151 | 116 | 95  | 82  | 75  |  |
| 4     | 0.79             | 243                                               | 163 | 126 | 101 | 72  | 61  | 53  | 45  |  |
| 5     | 1.0              | 192                                               | 144 | 120 | 95  | 50  | 50  | 51  | 46  |  |
| 6     | 1.2              | 158                                               | 110 | 83  | 62  | 41  | 38  | 31  | 25  |  |

**Table. S1b** Specific capacitance values calculated from GCD

| S.<br>No | Current Density ( $A\ g^{-1}$ )<br>Active Mass (mg) | Specific Capacitance ( $F\ g^{-1}$ ) from GCD |     |     |     |    |
|----------|-----------------------------------------------------|-----------------------------------------------|-----|-----|-----|----|
|          |                                                     | 0.5                                           | 0.8 | 1   | 2   | 5  |
| 1        | 0.28                                                | 556                                           | 407 | 258 | 144 | 81 |
| 2        | 0.42                                                | 243                                           | 198 | 184 | 132 | 70 |
| 3        | 0.56                                                | 156                                           | 132 | 127 | 90  | 38 |
| 4        | 0.79                                                | 107                                           | 83  | 73  | 41  | 18 |
| 5        | 1.0                                                 | 89                                            | 72  | 63  | 38  | 17 |
| 6        | 1.2                                                 | 60                                            | 42  | 36  | 17  | 6  |

**Table. S1c** Areal capacitance values calculated from CV

| S.<br>No | Scan Rate ( $mV\ s^{-1}$ )<br>Active Mass (mg) | Areal Capacitance ( $mF\ cm^{-2}$ ) from CV |     |     |    |    |    |    |     |
|----------|------------------------------------------------|---------------------------------------------|-----|-----|----|----|----|----|-----|
|          |                                                | 1                                           | 5   | 10  | 20 | 40 | 60 | 80 | 100 |
| 1        | 0.28                                           | 155                                         | 118 | 100 | 85 | 67 | 56 | 51 | 47  |
| 2        | 0.42                                           | 163                                         | 120 | 100 | 80 | 62 | 51 | 45 | 41  |
| 3        | 0.56                                           | 175                                         | 125 | 110 | 85 | 65 | 53 | 46 | 42  |
| 4        | 0.79                                           | 192                                         | 129 | 100 | 80 | 57 | 48 | 42 | 36  |
| 5        | 1.0                                            | 192                                         | 144 | 120 | 95 | 50 | 50 | 51 | 46  |
| 6        | 1.2                                            | 190                                         | 132 | 100 | 75 | 50 | 46 | 37 | 30  |

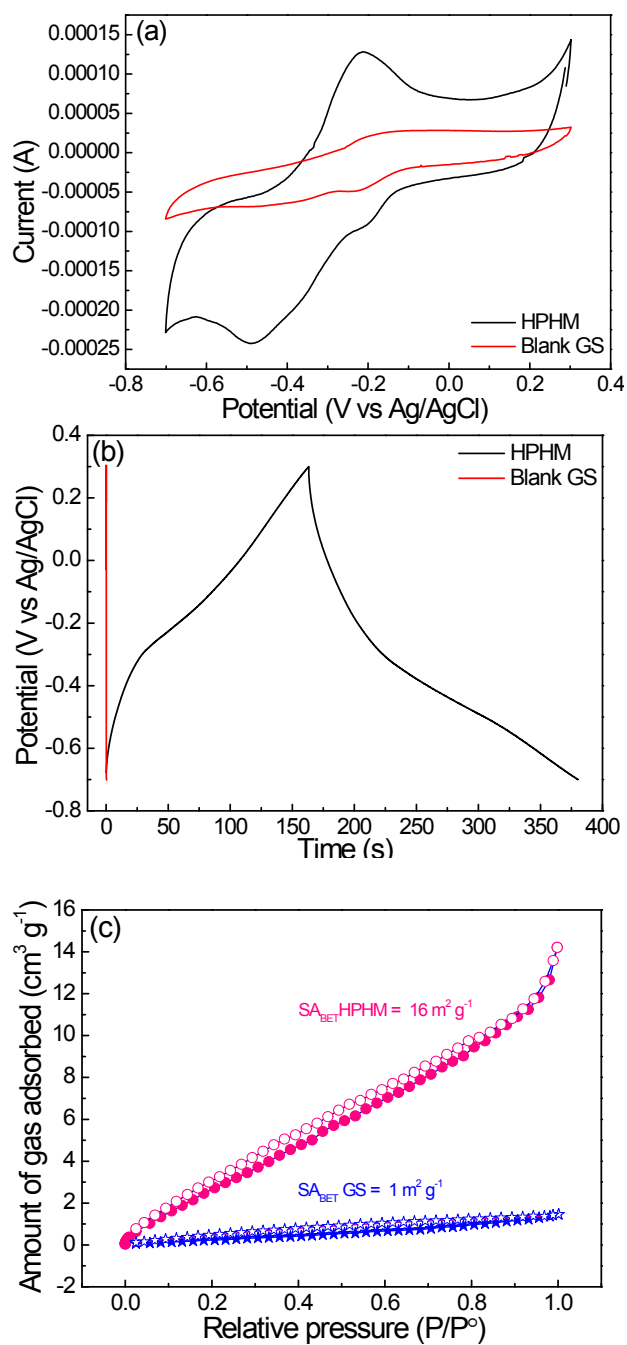

**Fig. S3** Comparison of between HPHM and current collector graphite sheet (GS) (a) Cyclic voltammograms at  $1 \text{ mV s}^{-1}$  (b) Galvanostatic charge/discharge at  $0.5 \text{ A g}^{-1}$  and (c)  $SA_{\text{BET}}$



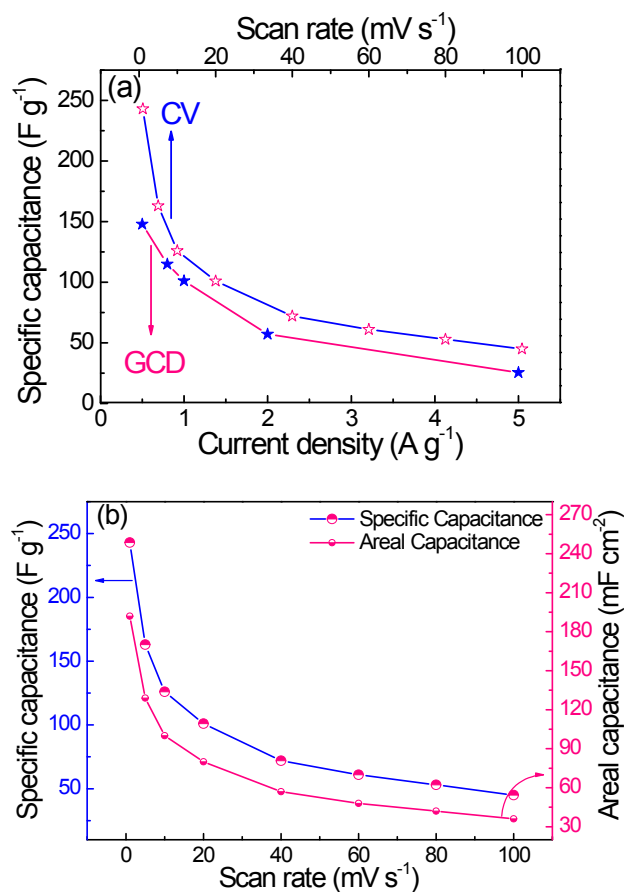

**Fig. S4** (a) Comparison of specific capacitance vs current density and scan rate and (b) Comparison of specific and areal capacitance at different scan at optimal mass loading of HPHM.

**Table. S2** Comparison of HPHM electrode capacitance with recent reported hybrid material.

| S. N.     | Hybrid Materials                       | C <sub>sp</sub> (F g <sup>-1</sup> ) | C <sub>ar</sub> (mFcm <sup>-2</sup> ) | Electrolyte                                      | SA <sub>BET</sub> (m <sup>2</sup> g <sup>-1</sup> ) | % Retention | Ref.                |
|-----------|----------------------------------------|--------------------------------------|---------------------------------------|--------------------------------------------------|-----------------------------------------------------|-------------|---------------------|
| 1         | DAP-RGO                                | 317                                  | --                                    | 1 M H <sub>2</sub> SO <sub>4</sub>               | 33                                                  | 90          | S8                  |
| 2         | WSS                                    | --                                   | 5.23                                  | 1 M LiClO <sub>4</sub>                           | --                                                  | 94          | S9                  |
| 3         | NOMCs                                  | 193                                  | --                                    | 6 M KOH                                          | 583-847                                             | 90          | S10                 |
| 4         | DAC@MoS <sub>2</sub>                   | 261                                  | --                                    | 1 M Na <sub>2</sub> SO <sub>4</sub>              | 1509                                                | 88          | S11                 |
| 5         | PCs                                    | 295                                  | --                                    | 6 M KOH                                          | 1945                                                | 100         | S12                 |
| 6         | PEDOT/PANi hydrogel                    | 112                                  | 242                                   | PVA-H <sub>2</sub> SO <sub>4</sub>               | --                                                  | 80.8        | S13                 |
| 7         | Functionalized GO                      | 127                                  | --                                    | --                                               | --                                                  | 90          | S14                 |
| 8         | N,P-CBC                                | 118                                  | --                                    | 6 M KOH                                          | 731                                                 | 76          | S15                 |
| 9         | PEDOT NW                               |                                      | 413                                   | PVA-Polydopaamine-H <sub>2</sub> SO <sub>4</sub> | --                                                  | 94          | S16                 |
| 10        | PEDOT:PSS/MWCNT                        | 1314                                 | --                                    | KI-1 M H <sub>2</sub> SO <sub>4</sub>            | --                                                  | 87.6        | S17                 |
| 11        | PEDOT                                  | 203                                  | --                                    | 1 M H <sub>2</sub> SO <sub>4</sub>               | --                                                  | 86          | S18                 |
| 12        | PEDOT:PSS/MWCNT                        | 22,3                                 | --                                    | PVA/H <sub>3</sub> PO <sub>4</sub>               | --                                                  | 72          | S19                 |
| 13        | BP                                     | 80.7                                 |                                       | PVA/H <sub>3</sub> PO <sub>4</sub>               | --                                                  | 80          | S20                 |
| 14        | PU                                     | 43                                   | --                                    | PVA/H <sub>3</sub> PO <sub>4</sub>               | --                                                  | 72          | S21                 |
| <b>15</b> | <b>HPHM* (*= Optimal mass loading)</b> | <b>243</b>                           | <b>192</b>                            | <b>0.5 N KOH</b>                                 | <b>16</b>                                           | <b>87</b>   | <b>Present work</b> |

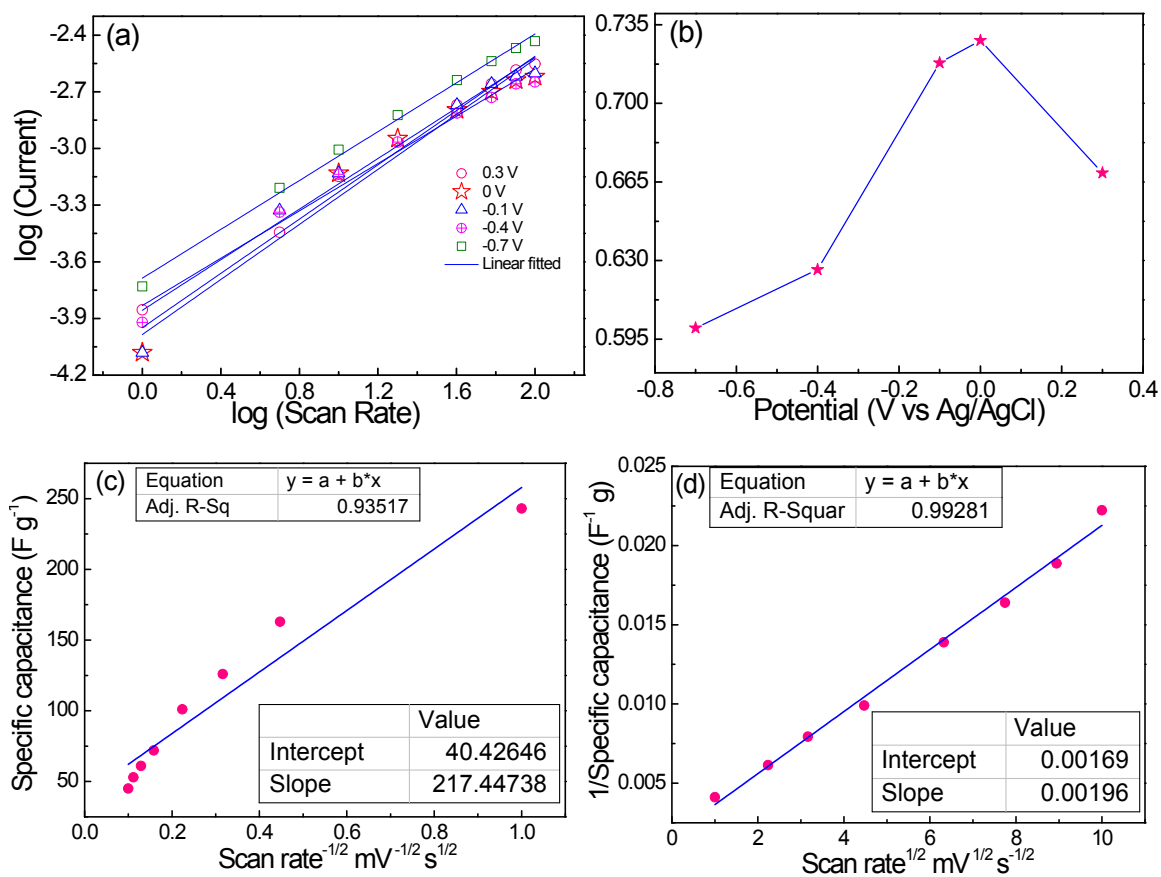

**Fig. S5** EDLC and pseudo contribution calculation using (a)  $\log(\text{Current})$  vs  $\log(\text{Scan rate})$  at fixed potential (b)  $b$  values vs potential (Ag/AgCl) and (c, d) Trasatti plots.

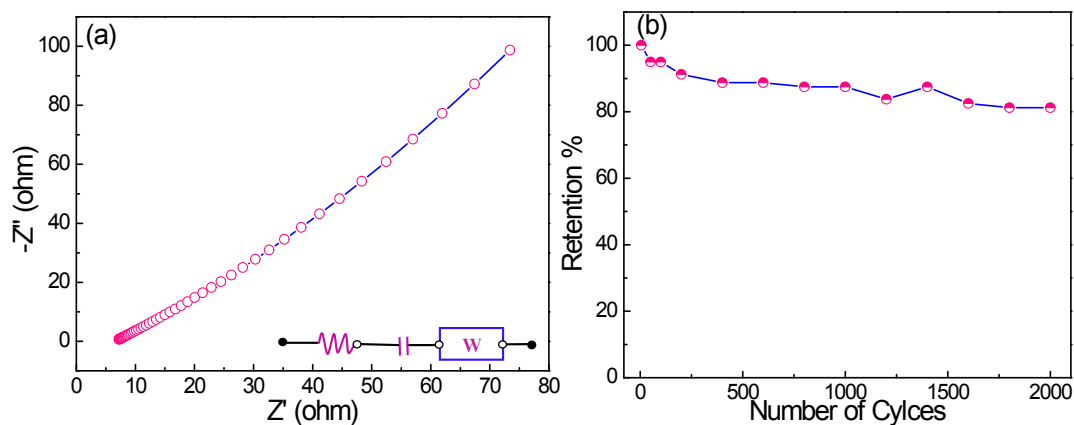

**Fig. S6** (a) EIS study (equivalent circuit diagram in the inset) and (b) Cyclic stability up to 2000 cycles in 0.5 N KOH electrolyte vs Ag/AgCl.

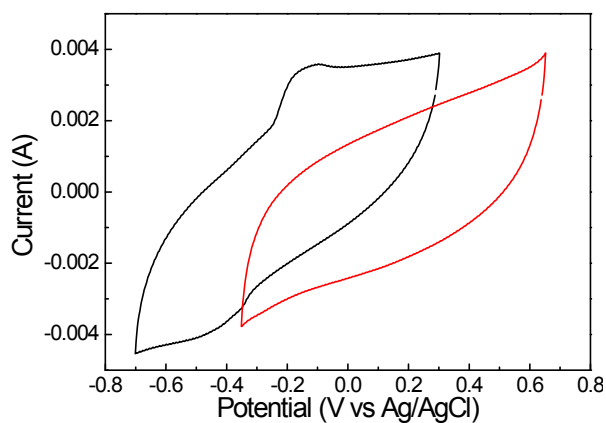

**Fig. S7** Anodic and cathodic response of HPHM.

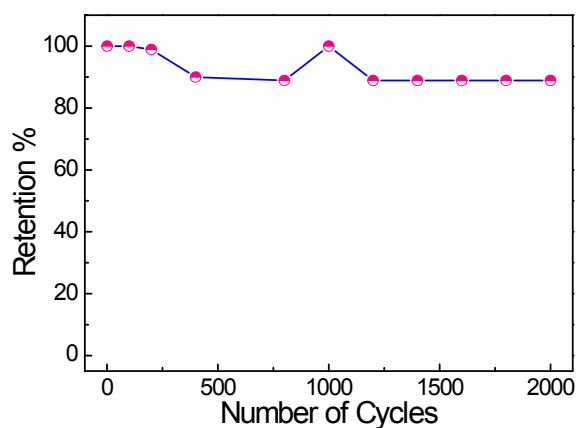

**Fig. S8** Cyclic stability of HPHM solid state symmetric device upto 2000 cycles in PVA-KOH electrolyte.

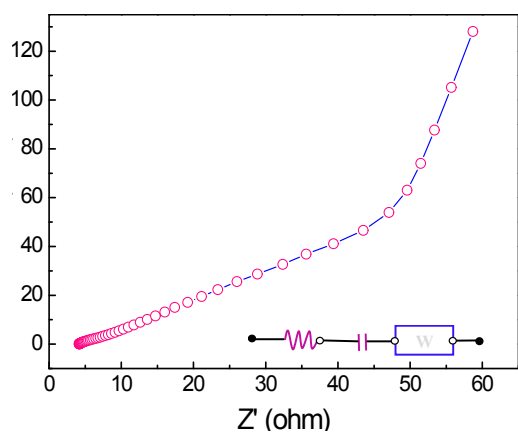

**Fig. S9** EIS study (equivalent circuit diagram in the inset) of HPHM solid state symmetric device.

## References

- S1 C. Haider, Electrodes in potentiometry. <https://www.metrohm.com/en-us/documents/80155013>
- S2 Silver/silver chloride reference electrode-the ecological alternative for calomel reference electrodes. <https://www.metrohm.com/en/documents/81095022>
- S3 Q. Lu, Z. J. Mellinger, W. Wang, W. Li, Y. Chen, J. G. Chen and J. Q. Xiao, *ChemSusChem*, 2011, **3**, 1367-1370.
- S4 D. Wang, A. Wei, L. Tian, A. Mensah, D. Li, Y. Xu and Q. Wei, *Appl. Surf. Sci.*, 2019, **483**, 593-600.
- S5 A. S. Rajpurohit, N. S. Punde, C. R. Rawool and A. K. Srivastava, *Chem. Eng. J.*, 2019, **371**, 679-692.
- S6 V. Sharma, S. Khilari, D. Pradhan and P. Mohanty, *RSC Adv.*, 2016, **6**, 56421-56428.
- S7 V. Sharma, A. Sahoo, Y. Sharma and P. Mohanty, *RSC Adv.*, 2015, **5**, 45749-45754.
- S8 X. Zhang, D. Wang, M. Yang, X. Xia, H. Chen, Y. Chen and H. Liu, *J. Solid State Electr.*, 2018, **22**, 1921-1931.
- S9 K. Keum, G. Lee, H. Lee, J. Yun, H. Park, S. Y. Hong, C. Song, J. W. Kim and J. S. Ha, *ACS Appl. Mater. Interfaces*, 2018, **10**, 26248-26257.
- S10 L. Liu, S. D. Xu, F. Y. Wang, Y. J. Song, J. Liu, Z. M. Gao and Z. Y. Yuan, *RSC Adv.*, 2017, **7**, 12524-12533.
- S11 D. N. Sangeetha and M. Selvakumar, *Appl. Surf. Sci.*, 2018, **453**, 132-140.
- S12 B. Chen, W. Wu, C. Li, Y. Wang, Y. Zhang, L. Fu, Y. Zhu, L. Zhang and Y. Wu, *Sci. Rep.*, 2019, [doi.org/10.1038/s41598-019-41769-y](https://doi.org/10.1038/s41598-019-41769-y).
- S13 Z. Yang, J. Ma, B. Bai, A. Qiu, D. Losic, D. Shi and M. Chen, *Electrochim. Acta*, 2019, **322**, 134769-134778.
- S14 X. Zhang, L. Hou, F. Richard and P. Samori, *Chem. Euro. J.*, 2018, [10.1002/chem.201803184](https://doi.org/10.1002/chem.201803184).
- S15 D. Kong, L. Cao, Z. Fang, F. Lai, Z. Lin, P. Zhang and W. Li, *Ionics*, 2019, **25**, 4341- 4350.
- S16 D. Ni, Y. Chen, H. Song, C. Liu, X. Yang and K. Cai, *J. Mater. Chem. A*, 2019, **7**, 1323-1333.
- S17 X. Gao, L. Zu, X. Cai, C. Li, H. Lian, Y. Liu, X. Wang and X. Cui, *Nanomater.*, 2018, **8**, [doi:10.3390/nano8050335](https://doi.org/10.3390/nano8050335).

- S18 M. Rajesh, C. J. Raj, R. Manikandan, B. C. Kim, S. Y. Park and K. H. Yu, *Mater. Today Energy*, 2017, **6**, 96-104.
- S19 M. dos S. Klem, R. M. Morais, R. J. G. Rubira and N. Alves, *Thin Solid Films*, 2019, **669** 96-102.
- S20 M. Wen, D. Liu, Y. Kang, J. Wang, H. Huang, J. Li, P. K. Chu and X. F. Yu, *Mater. Horiz.*, 2019, **6**, 176-181.
- S21 H. T. Jeong, J. F. Du, Y. R. Kim, C. J. Raj and B. C. Kim, *J. Alloy Compd.*, 2019, **777**, 67-72.
